# Supplementary material for: Assessment of the Nutritional Value of Selected Wild Food Plants in Türkiye and Their Promotion for Improved Nutrition
Source: MDPI journal article supplement (doi:10.3390/su141711015), 2022-09-03
Supplement: s1 [file s1]

**Table S1.** BFN priority wild food plants of Turkey from the Aegean, Mediterranean and Black Sea Region pilot sites

| AEGEAN REGION |                                                                                    |                       |                                                                                     |                 |                                                                                                                                                                                                 |                |                                                                                                                                                                                                                       |
|---------------|------------------------------------------------------------------------------------|-----------------------|-------------------------------------------------------------------------------------|-----------------|-------------------------------------------------------------------------------------------------------------------------------------------------------------------------------------------------|----------------|-----------------------------------------------------------------------------------------------------------------------------------------------------------------------------------------------------------------------|
| Family        | Botanical name                                                                     | English name          | Photograph                                                                          | Turkish name    | Local Names                                                                                                                                                                                     | Parts used     | Preparation methods                                                                                                                                                                                                   |
| Amaranthaceae | <i>Beta maritima</i> L.                                                            | Sea beet              |   | Kıyı pancarı    | Deli pazı, yabani pancar, yaban pazısı, ova mancarı, pezik, deniz pancarı, dağ pancarı, kır pazısı, zık, yaban pancarı, kara mancar, kara pancar, deli ıspanak, yaban ıspanağı, düdüklü ıspanak | Rosette leaves | Its leaves are served raw or cooked and used in pies and pancakes, omelettes, soups, stuffed for dolma, sautéed or boiled and used in salads, served with or without yoghurt. Sea beets are also cooked like spinach. |
| Amaranthaceae | <i>Salicornia emericii</i> Duval-Jouve<br>Lectotype: <i>Salicornia europaea</i> L. | Glasswort or Samphire |  | Deniz börülcesi | Kurşun otu, tuzlu ot, geren otu                                                                                                                                                                 | Young plants   | Glasswort is usually cooked or steamed and then coated in olive oil and lemon or yoghurt. It is also used raw.                                                                                                        |

|          |                                        |               |                                                                                      |                           |                                                                                                                                                 |                                     |                                                                                                                                                                                                               |
|----------|----------------------------------------|---------------|--------------------------------------------------------------------------------------|---------------------------|-------------------------------------------------------------------------------------------------------------------------------------------------|-------------------------------------|---------------------------------------------------------------------------------------------------------------------------------------------------------------------------------------------------------------|
| Apiaceae | <i>Crithmum maritimum</i> L.           | Rock samphire |    | Deniz teresi, Kaya kuruğu | Deniz rezenesi, deniz marulu, deniz otu, ada börölcesi, deniz kuruğu, deniz keneviri, kereviz otu, genevir, girdama, gövelek, kulak otu, kişgil | Young plants leaves and flower buds | The stems, flowers and leaves are pickled. Leaves are used fresh or boiled in salads, or used in omelettes.                                                                                                   |
| Apiaceae | <i>Foeniculum vulgare</i> Mill.        | Fennel        |    | Arapsaçı                  | Rezene, çaşır, çaşıra, kokar ot, malatura, erezene, razıyane, sıra, marata                                                                      | Whole plant                         | Highly aromatic and flavourful, fennel leaves are used in various foods as well as seasoning. Boiled leaves are used in salads and sautéed as well as in pilafs, omelettes, salads, pies, pancakes and soups. |
| Apiaceae | <i>Opopanax hispidus</i> (Friv.) Gris. | Yellow Herb   |  | Kaymacık                  | Sarı ot, sarı bacı, kaymaklık, kaymak otu, kırk sıralı, gaymecik, tülü ot, kekire                                                               | Young basal leaves                  | The leaves are cooked with tomato paste, sautéed with/without cream and milk, or boiled and added to omelettes, served with/without yoghurt. Opopanax pancake is also common.                                 |

|            |                                                                               |             |                                                                                     |              |                                                                                                                                                     |                                          |                                                                                                                                                                                                                                                                    |
|------------|-------------------------------------------------------------------------------|-------------|-------------------------------------------------------------------------------------|--------------|-----------------------------------------------------------------------------------------------------------------------------------------------------|------------------------------------------|--------------------------------------------------------------------------------------------------------------------------------------------------------------------------------------------------------------------------------------------------------------------|
| Apiaceae   | <i>Smyrniolus satrum</i> L.                                                   | Alexanders  |   | Deli kereviz | Yabani kereviz, baldıran                                                                                                                            | Leaves, young stems and buds             | Alexanders tastes like a mix of celery and parsley. It can be sautéed, stewed or fried and used in salads, rice, omelettes, pies, sauces and soups. It is also used as a medicinal herb.                                                                           |
| Asteraceae | <i>Glebionis coronaria</i> (L.) Spach<br>Syn: <i>Chrysanthemum segetum</i> L. | Crown Daisy |   | Alagömeç     | Ale gümecı, sarı papatya, öküz gözü, koyun gözü, yabani krizantem                                                                                   | Young sprouts                            | Crown daisy is used in omelettes, soups, bulgur and sautéed, in salads with or without yoghurt.                                                                                                                                                                    |
| Asteraceae | <i>Cichorium intybus</i> L.                                                   | Chicory     |  | Hindiba      | Hindibag, yabani hindiba, kara hindiba, tatlı hindiba, ak hindiba, güneş, güneşik, yatlı güneş, ak güneş, radika, bahçe radikası, altlık, çatlangoz | Whole young plant/ rosette leaves, roots | The leaves are boiled or used raw in salads. Leaves are simply sautéed, mixed with herbs or added to scrambled eggs. The plant can also be used in soups, omelettes and patties. Dry leaves are used as tea. Roots are also baked and used as a coffee substitute. |

|              |                                 |                |                                                                                     |                |                                                                                                                                                                         |                       |                                                                                                                                                                                 |
|--------------|---------------------------------|----------------|-------------------------------------------------------------------------------------|----------------|-------------------------------------------------------------------------------------------------------------------------------------------------------------------------|-----------------------|---------------------------------------------------------------------------------------------------------------------------------------------------------------------------------|
| Asteraceae   | <i>Scolymus hispanicus</i> L.   | Golden thistle |   | Şevketi bostan | Akkız, akçakızı, altın diken, ak diken, diken otu, çetmi diken, sarı diken, sütlü diken, süt diken, güzel hisar diken                                                   | Roots, young leaves   | The plant's spiny leaves are stripped, the roots cleaned stewed or sautéed to prepare meat dishes. The roots and young leaves can also be used in salads, soups and egg dishes. |
| Brassicaceae | <i>Raphanus raphanistrum</i> L. | Wild Radish    |   | Eşek turpu     | Turpotu, yaban turpu yabani turp, çalgıcı otu, yabani hardal                                                                                                            | Young leaves and buds | Wild radish is sautéed or stewed and used in various dishes, salads, main courses, omelette or soups.                                                                           |
| Polygonaceae | <i>Rumex acetosella</i> L.      | Sorrel         |  | Kuzukulağı     | Ekşi kuzukulağı, lutka, ekşi kulak, eğişimene, ekşice, ekşimik, ekşilik ekşimelek, ekşimek, ekşimen, turşu otu, ebem ekşisi, ebenekşisi, oğlak kulağı, küçük kuzukulağı | Leaf                  | The leaves have a lemony, tangy and sour flavour. They are used raw in salads or cooked in soups, pies and egg dishes.                                                          |

## MEDITERRANEAN REGION

| Family        | Botanical name                        | English name           | Photograph                                                                          | Turkish name | Local Names                                                                                                                              | Parts used                                   | Preparation methods                                                         |
|---------------|---------------------------------------|------------------------|-------------------------------------------------------------------------------------|--------------|------------------------------------------------------------------------------------------------------------------------------------------|----------------------------------------------|-----------------------------------------------------------------------------|
| Acoraceae     | <i>Acorus calamus</i> L.              | Calamus or Sweet flag  |   | Eğir otu     | Azakeriği, Hazanbel, Eğir kökü                                                                                                           | Root (rhizome).                              | The rhizome is chewed and used as a herbal medicine. It is used as a spice. |
| Anacardiaceae | <i>Rhus coriaria</i> L.               | Elm leaved sumach      |   | Sumak        | Ekşi külü, somak ekşi, Derici sumağı, Mavru, Tadım, Tahru, Tatari, Tahri, Tetere, Teteni, Tetirli, Tetre, Tertri, Tirimli, Tutum, Tutuba | Fruit; Oil.                                  | The crushed fruit is a popular spice used in the Middle East.               |
| Apiaceae      | <i>Ferula elaeochytris</i><br>Korovin | Ferula or giant fennel |  | Çağ          | Çakşır, çağşır, çavşır, hitik                                                                                                            | Root (rhizome) is used as a herbal medicine. | The root is boiled and a tea prepared as a herbal medicine.                 |

|            |                                    |                   |                                                                                     |             |                                                                                                    |                         |                                                                     |
|------------|------------------------------------|-------------------|-------------------------------------------------------------------------------------|-------------|----------------------------------------------------------------------------------------------------|-------------------------|---------------------------------------------------------------------|
| Apiaceae   | <i>Ferulago trachycarpa</i> Boiss. | -                 |   | Kuzukemirdi | Kuzu kişnişi, Kurtkulağı, Kuzubaşı, Kuzukemirdi, Kuzukulağı, Kimyon otu, çakşırotu, çağşır, asaotu | Aerial parts and roots. | Gum is obtained from the incision of the roots. Fresh aerial parts. |
| Asteraceae | <i>Cichorium intybus</i> L.        | Common chicory    |   | Hindiba     | Hindiba, yabani hindiba, mavi hindiba, citlik                                                      | Leaves, roots           | Sautéed, salads. Roots are dried and used as a coffee substitute.   |
| Asteraceae | <i>Chondrilla juncea</i> L.        | Rush skeletonweed |  | Karakavuk   | Çıtlık, Çöpkanak, Karakavuk, Karakavut, Sakız otu, Sütlü ot                                        | Leaves                  | Salads                                                              |

|            |                                                                                   |                           |                                                                                     |            |                                                            |                                                                                                                         |                                                  |
|------------|-----------------------------------------------------------------------------------|---------------------------|-------------------------------------------------------------------------------------|------------|------------------------------------------------------------|-------------------------------------------------------------------------------------------------------------------------|--------------------------------------------------|
| Asteraceae | <i>Scorzonera cana</i><br>(C.A.Mey.) Griseb                                       | Salsify                   |   | Tekesakalı | Yakı Otu, Yemlik,<br>Dedesakalı,<br>Karakök,<br>Tekesakalı | Leaves                                                                                                                  | Cooking, salads                                  |
| Asteraceae | <i>Tragopogon porrifolius</i><br>subsp. <i>longirostris</i><br>(Sch.Bip.) Greuter | Purple salsify            |   | Helevan    | Teke sakalı                                                | Roots, leaves                                                                                                           | Used raw or cooked                               |
| Asteraceae | <i>Gundelia tournefortii</i> L.                                                   | Gundelia or<br>Tumbleweed |  | Kenger     | Kenger otu                                                 | The leaves,<br>stems, roots, and<br>immature flower<br>buds, are edible<br>when they first<br>sprout in early<br>spring | Used fresh or cooked and prepared like artichoke |

|               |                                              |            |                                                                                    |          |                                                                                                                                                                                                                                                             |              |                                                                                                                                                                       |
|---------------|----------------------------------------------|------------|------------------------------------------------------------------------------------|----------|-------------------------------------------------------------------------------------------------------------------------------------------------------------------------------------------------------------------------------------------------------------|--------------|-----------------------------------------------------------------------------------------------------------------------------------------------------------------------|
| Berberidaceae | <i>Berberis crataegina</i> DC.               | Berberis   |  | Karamuk  | Amberbaris, Diken<br>üzümü, Ekşimen<br>(Kayseri), Garamık,<br>Gıraba Gırabuh,<br>Gızanbah,<br>Hatuntuzluğu,<br>Kadıntuzluğu,<br>Kamberiz, Karaca<br>Karamih, Karamık,<br>Karamuk dikenii,<br>Karanbuk,<br>Kızambuk, Kızamık,<br>Sarı çalı                   | Fruits/seeds | Fruit can be consumed raw or in main meals and soups.<br>Vitamin C rich fruit can be consumed as tea, garnish, or<br>used to make compotes, syrups, jams and jellies. |
| Brassicaceae  | <i>Nasturtium officinale</i><br>R.Br., Aiton | Watercress |  | Suteresi | Acı gerdeme,<br>Cırcır, Çakandura,<br>Çünk, Derdime,<br>Gerdeme, Hardal<br>otu, Istapan,<br>Ispatan, İstapan,<br>İstepan, Kordomot,<br>Kerdeme,<br>Kurbağapisliği, Su<br>gerdemesi, Su<br>kerdemesi, Su<br>mancası, Tizik,<br>Tuzik, Yabani tere,<br>Gudime | Leaves       | Consumed raw or cooked. It has a sharp peppery, flavour<br>Mainly used as a garnish or as an addition to salads.                                                      |



|                 |                                                                                      |                        |                                                                                     |            |                                                                    |                |                                                                                                 |
|-----------------|--------------------------------------------------------------------------------------|------------------------|-------------------------------------------------------------------------------------|------------|--------------------------------------------------------------------|----------------|-------------------------------------------------------------------------------------------------|
| Capparaceae     | <i>Capparis spinosa</i> L.                                                           | Caper bush             |   | Kebere     | Gebre, kebere, kapari                                              | Fruits/seeds   | Pickled or canned. Used in salads, on pizza base as well as a garnish for meat and fish dishes. |
| Caryophyllaceae | <i>Gypsophila arrostii</i> subsp. <i>nebulosa</i> (Boiss. & Heldr.) Greuter & Burdet | Arrost's baby's-breath |   | Çöven      | Çöven out, Sabun out, Çegen, Tarlacı Çöveni, Kereviç Köpüğü, çuvan | Root (rhizome) | The root extract is used to make sweet preparations, particularly <i>helva</i> .                |
| Cupressaceae    | <i>Juniperus drupacea</i> Labill.                                                    | Syrian juniper         |  | Enek/andız | Büyük meyveli ardıç                                                | Fruit          | Molasses, traditional pekmez                                                                    |

|               |                                                    |              |                                                                                     |          |                                                                                                            |              |                                                                                                                                                                                                                                                                                                           |
|---------------|----------------------------------------------------|--------------|-------------------------------------------------------------------------------------|----------|------------------------------------------------------------------------------------------------------------|--------------|-----------------------------------------------------------------------------------------------------------------------------------------------------------------------------------------------------------------------------------------------------------------------------------------------------------|
| Dioscoreaceae | <i>Dioscorea communis</i> (L.)<br>Caddick & Wilkin | Black bryony |   | Dolambaç | Sarmaşık, tilkişen,<br>dövülmüş avrat<br>otu, gavur tilkişeni<br>and kara asma                             | Young shoots | Young shoots may be eaten raw, but they are usually<br>boiled and used in salads and omelettes.                                                                                                                                                                                                           |
| Fabaceae      | <i>Lupinus albus</i> L.                            | White lupin  |   | Termiye  | Acı bakla, Delice<br>bakla, Gavur<br>baklası, Kurt<br>baklası, Mısır<br>baklası, Yahudi<br>baklası, Tirmis | Seed         | Used as a protein-rich vegetable or savoury dish. Can be<br>used as a bean substitute, sautéed or ground and mixed with<br>flour to make bread. Sautéed, it can become a snack much<br>like peanuts. An edible oil is obtained from the seed.<br>Roasted and ground it can be used as a coffee substitute |
| Liliaceae     | <i>Eremurus spectabilis</i><br>M.Bieb.             | Foxtail lily |  | Çiriş    | Çireş, Dağ pırasası,<br>Gülük, Kiriş, Sarı<br>çiriş, Sarı zambak,<br>Yabani pırasa                         | Young leaves | Used as vegetables. Sautéed with yoghurt, used to<br>prepare main meals and omelettes.                                                                                                                                                                                                                    |

|          |                                                           |            |                                                                                    |          |                                         |                  |                                                           |
|----------|-----------------------------------------------------------|------------|------------------------------------------------------------------------------------|----------|-----------------------------------------|------------------|-----------------------------------------------------------|
| Rosaceae | <i>Eriolobus trilobatus</i><br>(Labill. ex Poir.) M.Roem. | Crab apple |  | Atelması | Geyikeması,<br>geyicek, geyik<br>dikenı | Fruit and leaves | Fresh or boiled. The dried leaves are use for making tea. |
| Rosaceae | <i>Pyrus serikensis</i> Güner &<br>H. Duman               | Serik crab |  | Zingit   | Serik armudu,<br>gurmut                 | Fruit            | Fresh or boiled                                           |

**BLACK SEA REGION**

| Family        | Botanical name                    | English name                 | Photograph                                                                           | Turkish name  | Local Names                                                                       | Parts used              | Preparation method                                                                                                                                                    |
|---------------|-----------------------------------|------------------------------|--------------------------------------------------------------------------------------|---------------|-----------------------------------------------------------------------------------|-------------------------|-----------------------------------------------------------------------------------------------------------------------------------------------------------------------|
| Amaranthaceae | <i>Chenopodium album</i> L.       | Lamb's quarters              | 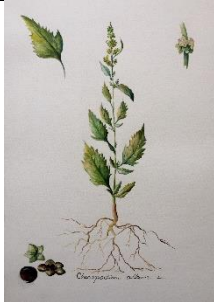   | Aksirken      | Sirken, kelebek, iblice, yaban otu, unluca, ak kaz ayağı, ak pazı, yabani ispanak | Leaves and young shoots | Use raw in salads or sautéed with or without yoghurt. Can also be cooked with bulgur or rice, or mixed with other vegetables and used to prepare patties and pancakes |
| Apiaceae      | <i>Aegopodium podagraria</i> L.   | Ground elder                 |    | Keçiayağı     | Mendek, tavuk ayağı, kır marulu                                                   | Young leaves            | Can be eaten raw or sautéed with yoghurt, rice or bulgur.                                                                                                             |
| Apiaceae      | <i>Oenanthe pimpinelloides</i> L. | Corky-fruited water-dropwort |  | Deli maydanoz | Kazıyak, Gazyak                                                                   | Leaves                  | Is sautéed with or without egg, with leeks and onion. Used to make pastries, it can also be cooked with yoghurt and bulgur.                                           |

|              |                                            |                   |                                                                                     |              |                                                                                                                            |                           |                                                                                                                                                                                                                                        |
|--------------|--------------------------------------------|-------------------|-------------------------------------------------------------------------------------|--------------|----------------------------------------------------------------------------------------------------------------------------|---------------------------|----------------------------------------------------------------------------------------------------------------------------------------------------------------------------------------------------------------------------------------|
| Asparagaceae | <i>Ornithogalum umbellatum</i> L.          | Star of Bethlehem |   | Sunbala      | Sakarca, Sakarcık, Akyıldız, Çöplüce, Karga Soğanı, Tükrük otu                                                             | Leaves and bulbs          | Used for making bread, or sautéed with or without egg. Can also be cooked with cranberry molasses and rice.                                                                                                                            |
| Boraginaceae | <i>Trachystemon orientalis</i> (L.) G.Don  | Eastern borage    |   | Kaldirik     | Kaldırayak, Kaldırık, Kalduruk, Galdirik, Galdirek, Ispıt, Zılbit, Hodan, Zıbıdk, deremancarı, Burğı, Deve mancarı, Tamara | Leaves, stems and flowers | Consumed as vegetable in the spring time. Steamed it can be used as a salad with or without yoghurt dressing or sautéed, with bulgur or to make pies. Can also be pickled and its larger leaves used for making stuffed rolls (dolma). |
| Brassicaceae | <i>Capsella bursa-pastoris</i> (L.) Medik. | Shepherd's purse  |  | Çobançantası | Medik, kuşekmeği, lamzam                                                                                                   | Aerial parts, leaves      | Can be eaten raw in salads or cooked with rice and rice soups. It can be sautéed after boiling with or without yoghurt or cooked together with curly dock. Also used in patties or pancakes.                                           |

|                 |                                        |                      |                                                                                     |         |                                                                                   |        |                                                                                                                                                                                               |
|-----------------|----------------------------------------|----------------------|-------------------------------------------------------------------------------------|---------|-----------------------------------------------------------------------------------|--------|-----------------------------------------------------------------------------------------------------------------------------------------------------------------------------------------------|
| Caryophyllaceae | <i>Silene vulgaris</i> (Moench) Garcke | Bladder campion      |   | Ecibücü | Mendek, tavukayağı, kır marulu, şakşak, gıvışgan                                  | Leaves | It can be sautéed with or without egg; also used to make pastries, rice, bulgur and soups.                                                                                                    |
| Polygonaceae    | <i>Rumex crispus</i> L                 | Curly dock           |   | Labada  | Kıvırcık labada, labada otu, efelek, evelik, eveleyük, ekşi mancar, sığır kuyruğu | Leaves | The boiled leaves can be sautéed and served with or without yoghurt or used to make bulgur or pilaf. The larger leaves are also stuffed. The sun dried leaves are consumed during the winter. |
| Polygonaceae    | <i>Polygonum cognatum</i> Meissn.      | Knotgrass (knotweed) |  | Madımak | İbi otu, kuşekmeği                                                                | Leaves | Can be cooked plain, with bulgur or used in soups.                                                                                                                                            |

|             |                          |           |                                                                                    |          |                                                                                                                                                                                                           |              |                                                                                                                                                                              |
|-------------|--------------------------|-----------|------------------------------------------------------------------------------------|----------|-----------------------------------------------------------------------------------------------------------------------------------------------------------------------------------------------------------|--------------|------------------------------------------------------------------------------------------------------------------------------------------------------------------------------|
| Smilacaceae | <i>Smilax excelsa</i> L. | Catbriers |  | Dikenucu | Kırçan, çoban ekmeği, dikenözü, müzmelek, müzmüldek, itmük, özdikenî, öz, kırçıyık, melevcan, melocan, melvocan, boylu gıcır, saparna, Anadolu saparnası, iz dikenî, silcan, zimbilaçi, zimilaci, zimilas | Young shoots | The young shoots can be eaten raw or cooked. Used in stews, it is cooked with tomato or pepper paste. Can also be boiled and sautéed with eggs; or used for making pastries. |
|-------------|--------------------------|-----------|------------------------------------------------------------------------------------|----------|-----------------------------------------------------------------------------------------------------------------------------------------------------------------------------------------------------------|--------------|------------------------------------------------------------------------------------------------------------------------------------------------------------------------------|
